# Supplementary material for: Supramolecular recognition control of polyethylene glycol modified N-doped graphene quantum dots: tunable selectivity for alkali and alkaline-earth metal ions
Source: Royal Society of Chemistry journal article supplement (doi:10.1039/c5an02270c), 2015-12-18
Supplement: c5an02270c1.pdf [file c5an02270c1.pdf]

# Supplementary Information

**Supramolecular recognition control of polyethylene  
glycol modified N doped graphene quantum dots:  
tunable selectivity for alkali and alkaline-earth metal  
ions**

Siwei Yang, Jing Sun, Chong Zhu, Peng He, Zeng Peng and Guqiao Ding,\*

State Key Laboratory of Functional Materials for Informatics, Shanghai Institute of Microsystem  
and Information Technology, Chinese Academy of Science, Shanghai, P. R. China

\* Corresponding authors: Guqiao Ding, [gqding@mail.sim.ac.cn](mailto:gqding@mail.sim.ac.cn)

## **Experiment details**

### **Synthesis of PN-GQD-2**

Synthesis progress of PN-GQD-2 is shown in Figure 1a and as follows: 16.8 mg (0.1 mM) 1-Chloro-2-(2-methoxymethoxy-ethoxy)-ethane was added into 9.0 mL, 1.0 mg mL<sup>-1</sup> N-GQDs aqueous solution. The mixture were transferred to a Teflon-lined autoclave (10 mL) and heated at 180 °C for 24 h. The obtained aqueous solution was dialysed in a 3500 Da dialysis bag for a week to remove small molecules.

### **Synthesis of PN-GQD-3**

Synthesis progress of PN-GQD-3 is shown in Figure 1a and as follows: 22.6 mg (0.1 mM) 1-Chloro-2-{2-[2-(2-methoxy-ethoxy)-ethoxy]-ethoxy}-ethane was added into 9.0 mL, 1.0 mg mL<sup>-1</sup> N-GQDs aqueous solution. The mixture were transferred to a Teflon-lined autoclave (10 mL) and heated at 180 °C for 36 h. The obtained aqueous solution was dialysed in a 3500 Da dialysis bag for a week to remove small molecules.

### **Synthesis of PN-GQD-4**

Synthesis progress of PN-GQD-4 is shown in Figure 1a and as follows: 27.1 mg (0.1 mM) 1-Chloro-2-(2-{2-[2-(2-methoxy-ethoxy)-ethoxy]-ethoxy}-ethoxy)-ethane was added into 9.0 mL, 1.0 mg mL<sup>-1</sup> N-GQDs aqueous solution. The mixture were transferred to a Teflon-lined autoclave (10 mL) and heated at 180 °C for 36 h. The obtained aqueous solution was dialysed in a 3500 Da dialysis bag for a week to remove small molecules.

### **Synthesis of PN-GQD-5**

Synthesis progress of PN-GQD-5 is shown in Figure 1a and as follows: 31.5 mg (0.1 mM) 1-Chloro-2-[2-(2-{2-[2-(2-methoxy-ethoxy)-ethoxy]-ethoxy}-ethoxy)-ethoxy]-ethane was added into 9.0 mL, 1.0 mg mL<sup>-1</sup> N-GQDs aqueous solution. The mixture were transferred to a Teflon-lined autoclave (10 mL) and heated at 180 °C for 48 h. The obtained aqueous solution was dialysed in a 3500 Da dialysis bag for a week to remove small molecules.

#### **Synthesis of PN-GQD-6**

Synthesis progress of PN-GQD-6 is shown in Figure 1a and as follows: 35.8 mg (0.1 mM) 1-Chloro-2-{2-[2-(2-{2-[2-(2-methoxy-ethoxy)-ethoxy]-ethoxy}-ethoxy)-ethoxy]-ethoxy}-ethane was added into 9.0 mL, 1.0 mg mL<sup>-1</sup> N-GQDs aqueous solution. The mixture were transferred to a Teflon-lined autoclave (10 mL) and heated at 180 °C for 48 h. The obtained aqueous solution was dialysed in a 3500 Da dialysis bag for a week to remove small molecules.

#### **Synthesis of PN-GQD-1B**

Synthesis progress of PN-GQD-1B is shown in Figure 1a and as follows: 18.2 mg (0.1 mM) 1-Chloro-2-(2-ethoxymethoxy-ethoxy)-ethane was added into 9.0 mL, 1.0 mg mL<sup>-1</sup> N-GQDs aqueous solution. The mixture were transferred to a Teflon-lined autoclave (10 mL) and heated at 180 °C for 36 h. The obtained aqueous solution was dialysed in a 3500 Da dialysis bag for a week to remove small molecules.

#### **Synthesis of PN-GQD-1C**

Synthesis progress of PN-GQD-1C is shown in Figure 1a and as follows: 19.6 mg (0.1 mM) 2-[2-(2-Chloro-ethoxy)-ethoxymethoxy]-propane was added into 9.0 mL, 1.0 mg mL<sup>-1</sup> N-GQDs aqueous solution. The mixture were transferred to a Teflon-lined autoclave (10 mL) and heated at

180 °C for 48 h. The obtained aqueous solution was dialysed in a 3500 Da dialysis bag for a week to remove small molecules.

### **Synthesis of PN-GQD-1D**

Synthesis progress of PN-GQD-1D is shown in Figure 1a and as follows: 2.10 mg (0.1 mM) 2-[2-(2-Chloro-ethoxy)-ethoxymethoxy]-2-methyl-propane was added into 9.0 mL, 1.0 mg mL<sup>-1</sup> N-GQDs aqueous solution. The mixture were transferred to a Teflon-lined autoclave (10 mL) and heated at 180 °C for 72 h. The obtained aqueous solution was dialysed in a 3500 Da dialysis bag for a week to remove small molecules.

### **Quantum yield measurement**

As the most direct and important index, the quantum yield ( $\phi$ ) was calculated according to equation 1:

$$\phi = \phi_R \times \frac{I}{I_R} \times \frac{A_R}{A} \times \frac{\eta^2}{\eta_R^2} \quad (1)$$

where I is the measured integrated emission intensity,  $\eta$  is the refractive index of the solvent, A is the optical density, and the subscript R refers to the reference standard with a known  $\phi$  (quininesulfate,  $\phi_R=0.55$ ). In order to minimize reabsorption effects, absorbance was kept under 0.1 at 345 nm excitation wavelength in 10×10 mm fluorescence cuvette.

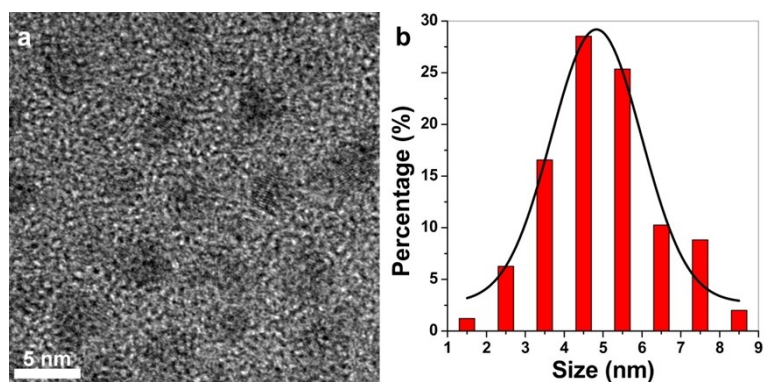

**Fig. S1** (a) TEM image of N-GQDs, (b) corresponding size distribution histogram of PN-GQD-1, the black curve is the Gaussian fitting curve.

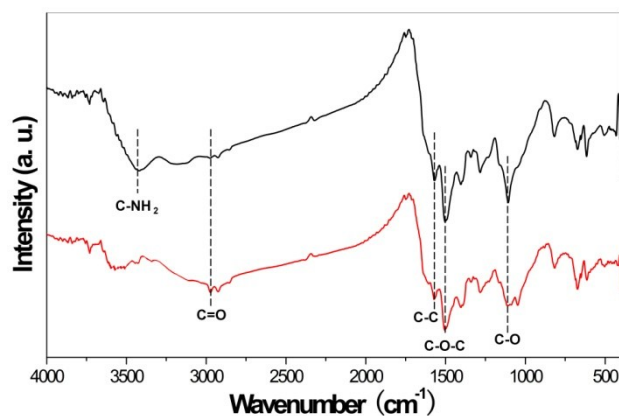

**Fig. S2** FT-IR spectra of N-GQDs (black curve) and PN-GQD-1 (red curve).

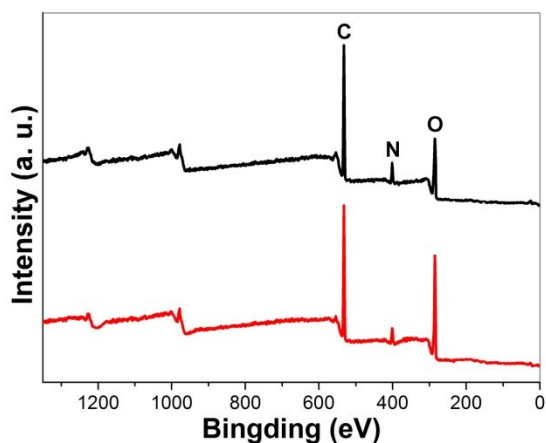

**Fig. S3** XPS spectra of N-GQDs (black curve) and PN-GQD-1 (red curve).

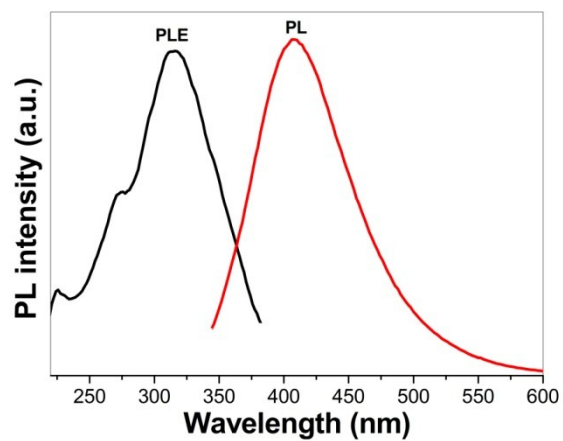

**Fig. S4** PL (red curve) and PLE (black curve) spectra of N-GQDs.

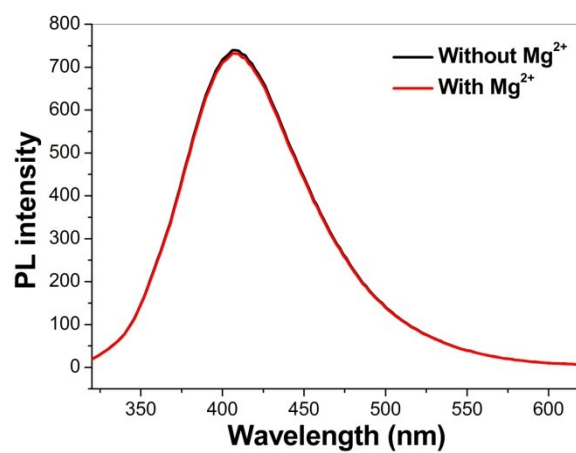

**Fig. S5** PL spectra of N-GQDs with (red curve) and without (black curve) Mg<sup>2+</sup>.

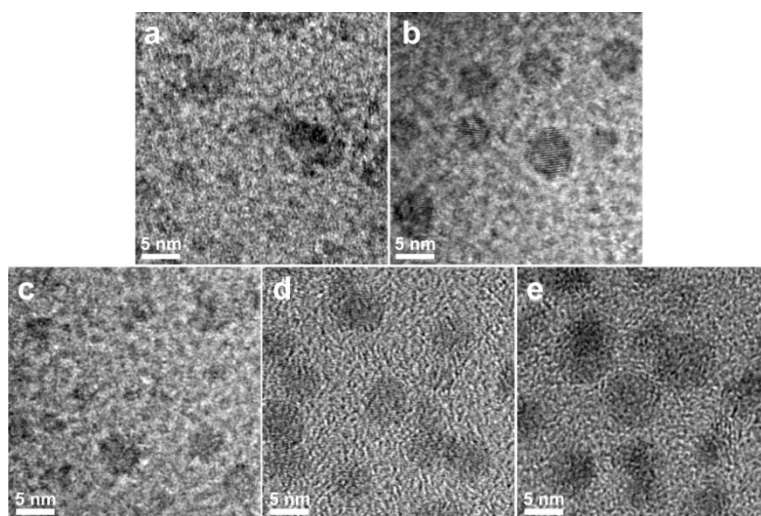

**Fig. S6** TEM images of (a) PN-GQD-2, (b) PN-GQD-3, (c) PN-GQD-4, (d) PN-GQD-5 and (e) PN-GQD-6.

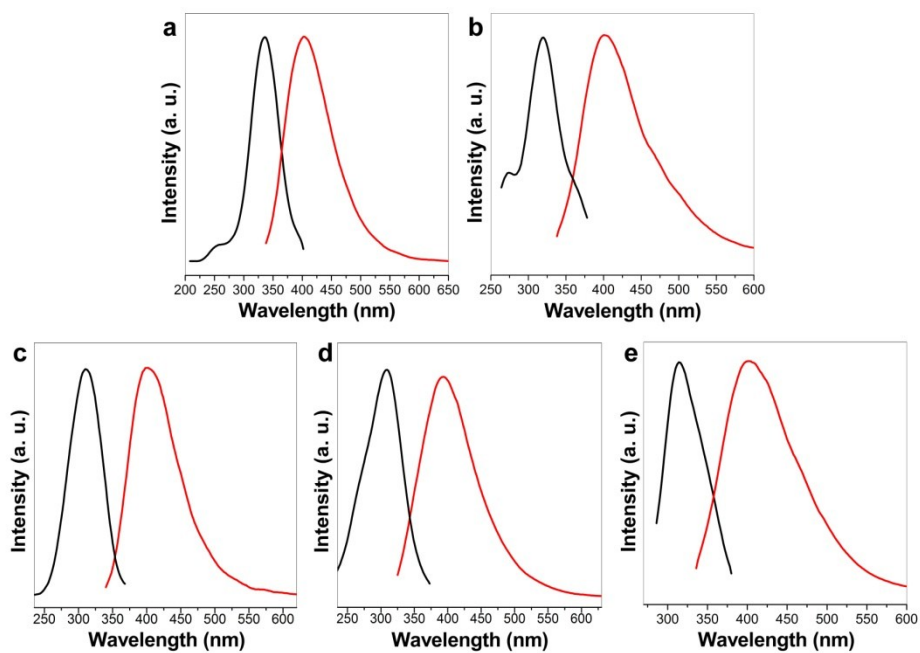

**Fig. S7** PL (red curve) and PLE (black curve) spectra of (a) PN-GQD-2, (b) PN-GQD-3, (c) PN-GQD-4, (d) PN-GQD-5 and (e) PN-GQD-6.

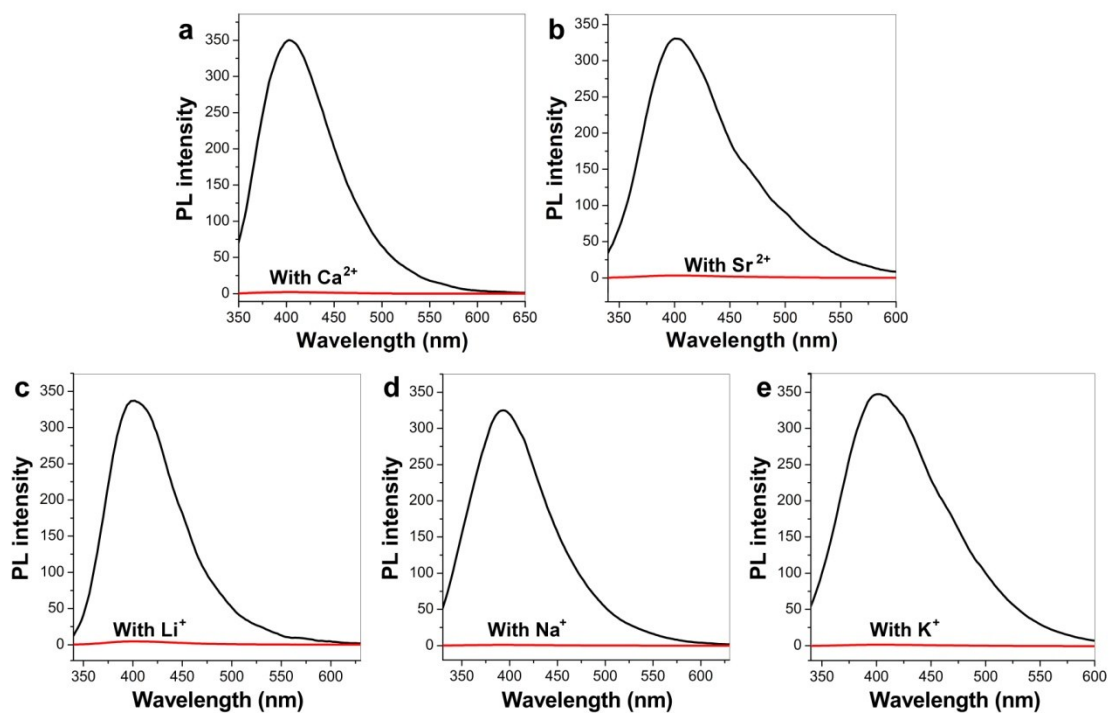

**Fig. S8** PL spectra of (a) PN-GQD-2, (b) PN-GQD-3, (c) PN-GQD-4, (d) PN-GQD-5 and (e) PN-GQD-6 with (red curve) and without (black curve) ions.

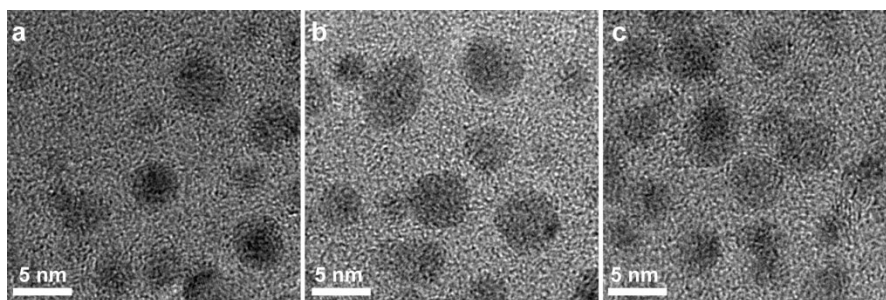

**Fig. S9** TEM images of (a) PN-GQD-1B, (b) PN-GQD-1C and (c) PN-GQD-1D.

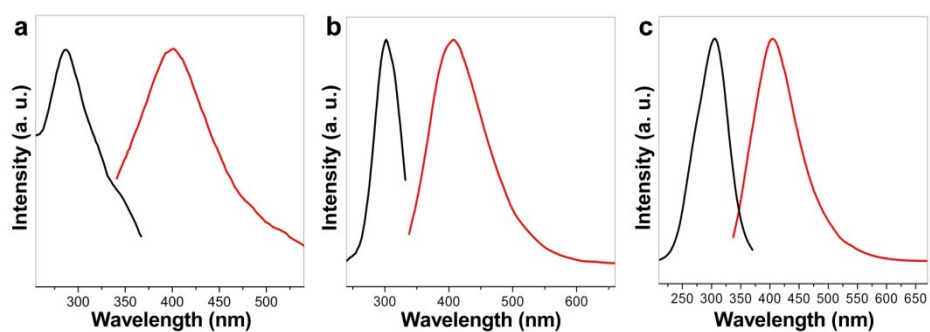

**Fig. S10** PL (red curve) and PLE (black curve) spectra of (a) PN-GQD-1B, (b) PN-GQD-1C and (c) PN-GQD-1D.

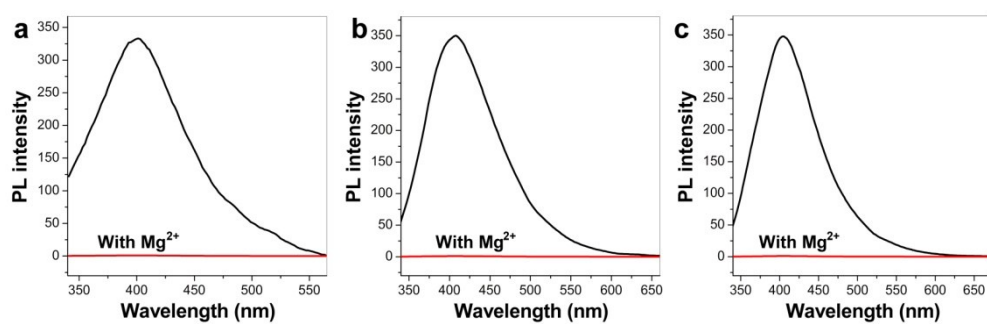

**Fig. S11** PL spectra of (a) PN-GQD-1B, (b) PN-GQD-1C and (c) PN-GQD-1D with (red curve) and without (black curve)  $Mg^{2+}$ .



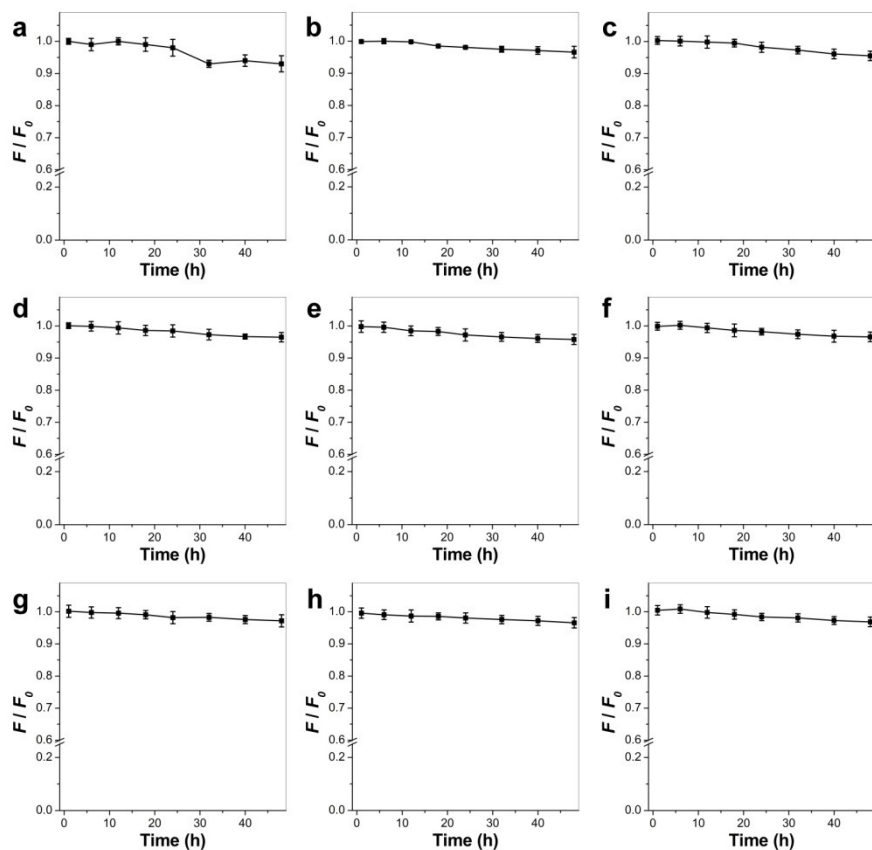

**Fig. S13** photostability of PN-GQDs under 365 nm UV light (100 W) at room temperature. (a) PN-GQD-1, (b) PN-GQD-2, (c) PN-GQD-3, (d) PN-GQD-4, (e) PN-GQD-5, (f) PN-GQD-6, (g) PN-GQD-1B, (h) PN-GQD-1C, (i) PN-GQD-1D. The concentration of PN-GQDs is 0.1 mg/mL.  $F_0$  is PL intensity of PN-GQDs,  $F$  is PL intensitie of PN-GQDs under different time.

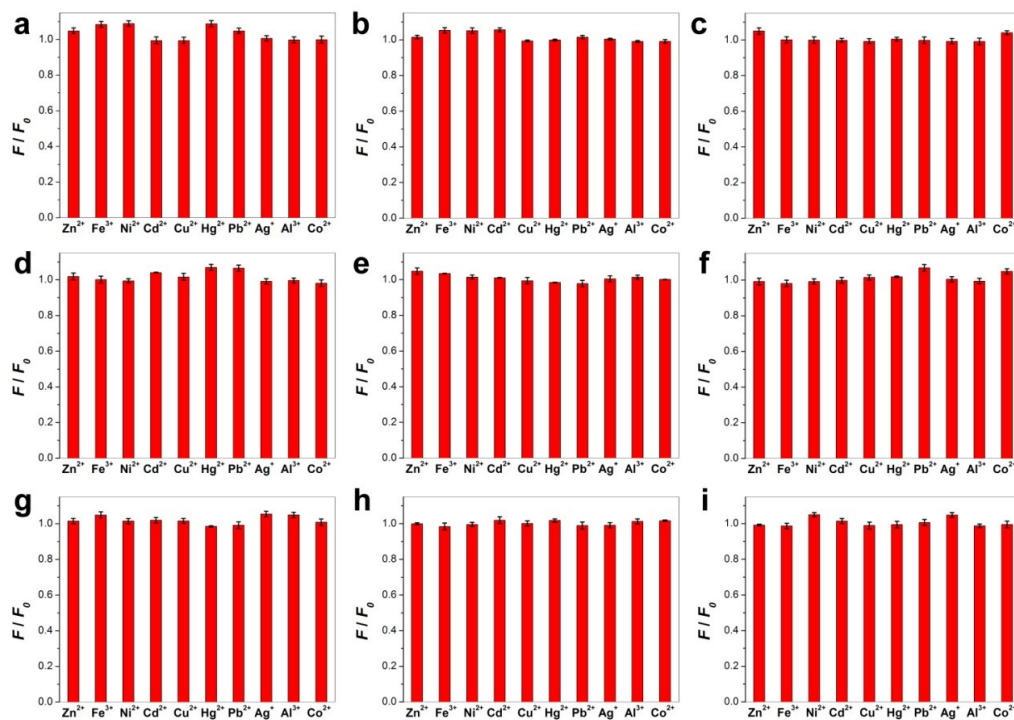

**Fig. S13** The difference in PL intensity of PN-GQDs aqueous solution between the blank and solutions containing different common positive ions ( $F_0$  and  $F$  are PL intensities in the absence and presence of ions, respectively. The concentrations of all ions are all 0.1 M, the concentrations of PN-GQDs is 0.5 mg mL<sup>-1</sup>). (a) PN-GQD-1, (b) PN-GQD-2, (c) PN-GQD-3, (d) PN-GQD-4, (e) PN-GQD-5, (f) PN-GQD-6, (g) PN-GQD-1B, (h) PN-GQD-1C, (i) PN-GQD-1D.

**Table S1.** Optical properties of N-GQDs and PN-GQDs

|           | $\lambda_{\text{ex}}$<br>(nm) | $\lambda_{\text{em}}$<br>(nm) | FWHM<br>(nm) | $\phi$ | $\tau$<br>(ns) | $\kappa_r$<br>( $10^7 \text{ S}^{-1}$ ) | Detection limit<br>(nM) | Linearity range<br>(M)                   | Ions             |
|-----------|-------------------------------|-------------------------------|--------------|--------|----------------|-----------------------------------------|-------------------------|------------------------------------------|------------------|
| N-GQD     | 321                           | 408                           | 70           | 0.74   | 9.2            | 8.04                                    | N                       | N                                        | N                |
| PN-GQD-1  | 321                           | 402                           | 90           | 0.71   | 8.0            | 8.88                                    | 0.2                     | $5 \times 10^{-10}$ - $5 \times 10^{-8}$ | $\text{Mg}^{2+}$ |
| PN-GQD-2  | 318                           | 400                           | 70           | 0.73   | 7.6            | 9.61                                    | 0.1                     | $3 \times 10^{-10}$ - $1 \times 10^{-8}$ | $\text{Ca}^{2+}$ |
| PN-GQD-3  | 322                           | 405                           | 80           | 0.69   | 8.8            | 7.84                                    | 0.4                     | $8 \times 10^{-10}$ - $2 \times 10^{-8}$ | $\text{Sr}^{2+}$ |
| PN-GQD-4  | 321                           | 399                           | 75           | 0.72   | 7.4            | 9.73                                    | 0.5                     | $1 \times 10^{-9}$ - $2 \times 10^{-8}$  | $\text{Li}^+$    |
| PN-GQD-5  | 322                           | 402                           | 80           | 0.71   | 8.2            | 8.66                                    | 0.1                     | $3 \times 10^{-10}$ - $1 \times 10^{-8}$ | $\text{Na}^+$    |
| PN-GQD-6  | 321                           | 405                           | 95           | 0.71   | 7.8            | 9.10                                    | 0.3                     | $8 \times 10^{-10}$ - $4 \times 10^{-8}$ | $\text{K}^+$     |
| PN-GQD-1B | 318                           | 402                           | 90           | 0.70   | 8.3            | 8.43                                    | 0.4                     | $8 \times 10^{-10}$ - $6 \times 10^{-8}$ | $\text{Mg}^{2+}$ |
| PN-GQD-1C | 316                           | 405                           | 70           | 0.71   | 7.6            | 9.34                                    | 0.9                     | $5 \times 10^{-9}$ - $8 \times 10^{-8}$  | $\text{Mg}^{2+}$ |
| PN-GQD-1D | 318                           | 402                           | 65           | 0.71   | 7.9            | 8.98                                    | 8.1                     | $2 \times 10^{-8}$ - $2 \times 10^{-6}$  | $\text{Mg}^{2+}$ |
